# Supplementary material
Source: HighWire-hosted journal article supplement (https://bmjopen.bmj.com/content/12/9/e067123)
Supplement: inline-supplementary-material-3 [file inline-supplementary-material-3.pdf]

### Supplementary Appendix 3: The Tessa Jowell BRAIN MATRIX Platform study World Health Organization Trial Registration Data Set

| Data category                                 | Information                                                                                                                                                                                                     |
|-----------------------------------------------|-----------------------------------------------------------------------------------------------------------------------------------------------------------------------------------------------------------------|
| Primary registry and trial identifying number | ClinicalTrials.gov<br>NCT04274283                                                                                                                                                                               |
| Date of registration in primary registry      | 18-Feb-2020                                                                                                                                                                                                     |
| Secondary identifying numbers                 | ISRCTN 14218060                                                                                                                                                                                                 |
| Source(s) of monetary or material support     | The Brain Tumour Charity<br>Genomics England<br>INNOVATE UK                                                                                                                                                     |
| Primary sponsor                               | University of Birmingham                                                                                                                                                                                        |
| Secondary sponsor(s)                          | n/a                                                                                                                                                                                                             |
| Contact for public queries                    | Dr Joshua Savage: <a href="mailto:brainmatrix@trials.bham.ac.uk">brainmatrix@trials.bham.ac.uk</a>                                                                                                              |
| Contact for scientific queries                | Prof. Colin Watts: <a href="mailto:c.watts.2@bham.ac.uk">c.watts.2@bham.ac.uk</a>                                                                                                                               |
| Public title                                  | The Tessa Jowell BRAIN MATRIX Platform Study                                                                                                                                                                    |
| Scientific title                              | A British Feasibility Study of Molecular Stratification and Targeted Therapy to Optimize the Clinical Management of Patients With Glioma by Enhancing Clinical Outcomes, Reducing Avoidable Toxicity, Improving |

| <b>Data category</b>                      | <b>Information</b>                                                                                                                                                                       |
|-------------------------------------------|------------------------------------------------------------------------------------------------------------------------------------------------------------------------------------------|
|                                           | Management of Post-operative Residual & Recurrent Disease and Improving Survivorship                                                                                                     |
| Countries of recruitment                  | UK                                                                                                                                                                                       |
| Health condition(s) or problem(s) studied | Newly diagnosed suspected, or progressive with known, WHO Grade 2-4 glioma                                                                                                               |
| Intervention(s)                           | None                                                                                                                                                                                     |
| Key inclusion and exclusion criteria:     | Ages eligible for study: ≥16 years<br>Sexes eligible for study: both<br>Accepts healthy volunteers: no                                                                                   |
|                                           | Inclusion criteria: Newly diagnosed suspected, or progressive with known, WHO Grade 2-4 glioma                                                                                           |
|                                           | Exclusion criteria: Primary spinal cord tumours, active treatment of other malignancy                                                                                                    |
| Study type                                | Observational                                                                                                                                                                            |
|                                           | Primary purpose: Feasibility of establishing an integrated histological-molecular diagnosis of glioblastoma                                                                              |
| Date of first enrolment                   | 14-Dec-2020                                                                                                                                                                              |
| Target sample size                        | 1000                                                                                                                                                                                     |
| Recruitment status                        | Open                                                                                                                                                                                     |
| Primary outcome(s)                        | <ul style="list-style-type: none"> <li>• Time (from biopsy) to integrated histological–molecular diagnosis (TTMD) using whole genome sequencing and epigenomic classification</li> </ul> |

| Data category            | Information                                                                                                                                                                                                                                                               |
|--------------------------|---------------------------------------------------------------------------------------------------------------------------------------------------------------------------------------------------------------------------------------------------------------------------|
| Key secondary outcome(s) | <ul style="list-style-type: none"><li>• Time to completion of each node of tissue and imaging pathway.</li><li>• Tumour and biological sample(s) quality control (QC) status.</li><li>• Imaging QC status.</li><li>• Inter-rater agreement of RANO assessments.</li></ul> |
